# Supplementary material for: Maize Response to Low Temperatures at the Gene Expression Level: A Critical Survey of Transcriptomic Studies
Source: Front Plant Sci. 2020 Sep 29;11:576941. doi: 10.3389/fpls.2020.576941 (PMC7550719; doi:10.3389/fpls.2020.576941)
Supplement: Supplementary file 4 [file Table_2.xlsx]

## Sheet: Arkusz1
Table S2. Maize genes changing expression at moderately low temperatures in at least two projects
* - number of main projects reporting the gene to change expression; for genes reported additionally by the ancillary project the score is increased by one. "Minus" sign denotes down-regulated genes. "Zero" marks genes showing inconsistent behaviour between main projects.
Only statistically significant expression changes upon cold treatment, as defined by respective study authors, are shown..
			Reference project: Sobkowiak et al., BMC Genomics 17: 125, 201			Avilla et al., BMC Genomics 19: 761, 2018		Szalai et al., Frontiers in Plant Sciences. 9: 850, 2018	Trzcinska-Danielewicz et al., Plant Science 177: 648–658, 2009	Ancillary project: Spence et al., Journal of Experimental Botany, 65: 3737–3747, 2014
			Inbred lines S68911, S50676, S160			Inbred lines CG60, CG120		Hybrid Nona	Inbred line CM109	Miscanthus × giganteus
GRMZM numbers according to AGPv.3	Annotation according to Gramene/MaizeGDB	number of consistent projects/direction of expression change	Expression change S68911	Expression change S50676	Expression change S160	Expression change CG60	Expression change CG120	Expression change	Expression change	Expression change
GRMZM2G018820	Glycerophosphodiester phosphodiesterase GDPD2	-5		down		down	down	down	down	down
AC194022.3_FG013		-4	down	down		down	down	down	down
GRMZM2G010034		-4	down	down	down	down	down	down	down
GRMZM2G053554	Alpha-galactosidase 3	-4	down	down	down	down	down	down	down
GRMZM2G103647	Basic leucine zipper 9	-4	down	down	down	down	down	down	down
GRMZM2G104443		-4	down	down	down	down	down	down	down
GRMZM2G138268	Auxin-responsive protein IAA14	-4	down	down	down	down	down	down		down
GRMZM2G400167	phosphatidylethanolamine-binding protein26	-4	down	down	down	down	down	down		down
GRMZM2G010433	Transmembrane amino acid transporter family protein	-4	down			down	down	down	down
GRMZM2G063566	Ribonucleoprotein A1, A2/B1 homolog	-4	down	down	down	down	down	down	down
GRMZM2G096407	Amino acid permease 6	-4	down	down	down	down	down	down	down
GRMZM2G122954		-4	down	down	down	down	down	down	down
GRMZM2G007466	Integrin-linked protein kinase family	-3	down			down	down	down
GRMZM2G010142	Probable mannan synthase 7	-3	down	down	down			down	down
GRMZM2G019106	Putative bZIP transcription factor superfamily protein	-3	down	down	down			down	down
GRMZM2G034471	cytochrome P450 family 78 subfamily A polypeptide 8	-3	down	down	down			down	down
GRMZM2G040145	IAP-like protein 1	-3	down	down		down	down	down
GRMZM2G042171	Sulfate transporter 2.2	-3	down	down	down			down	down
GRMZM2G049538	terpene synthase1	-3	down	down	down			down		down
GRMZM2G052422	1-aminocyclopropane-1-carboxylate oxidase35	-3	down	down				down		down
GRMZM2G053023	Thioredoxin	-3			down	down	down	down
GRMZM2G057305		-3		down	down	down	down	down
GRMZM2G064197	glk101 - G2-like-transcription factor 1	-3		down		down	down	down
GRMZM2G064437	Putative polyol transporter 1	-3	down	down	down	down	down	down
GRMZM2G068465	Sterol 14-demethylase	-3		down	down	down	down	down
GRMZM2G070508	Cytochrome P450 711A1	-3		down				down		down
GRMZM2G072911	Bifunctional dTDP-4-dehydrorhamnose 35-epimerase/dTDP-4-dehydrorhamnose reductase	-3		down	down	down	down	down
GRMZM2G074024	Regulator of chromosome condensation (RCC1) family protein	-3	down	down	down	down	down	down
GRMZM2G075348		-3	down	down	down	down	down	down
GRMZM2G081192	Aquaporin PIP2-3	-3			down	down	down	down
GRMZM2G092497	DNA (cytosine-5)-methyltransferase DRM2	-3	down	down	down	down	down	down
GRMZM2G111164	Enolase-phosphatase E1	-3	down	down	down	down	down	down
GRMZM2G112968	Endonuclease 2	-3	down	down	down	down	down	down
GRMZM2G113052		-3	down	down		down	down	down
GRMZM2G114503	Putative MYB DNA-binding domain superfamily protein%3B RADIALIS	-3	down		down	down	down	down
GRMZM2G116876	Non-specific phospholipase C1	-3		down	down	down	down	down
GRMZM2G118241	Serine carboxypeptidase-like 20	-3		down		down	down	down
GRMZM2G119802	mbd123 - methyl binding domain123)	-3	down	down	down	down	down	down
GRMZM2G130348	cyclin-like F-box	-3	down	down	down			down		down
GRMZM2G146818	40S ribosomal protein S19 mitochondrial	-3			down	down	down	down
GRMZM2G150866	Metallo-hydrolase/oxidoreductase superfamily protein	-3	down	down	down	down	down	down
GRMZM2G167018	NAC domain-containing protein 21/22	-3	down	down	down			down	down
GRMZM2G168502	WAT1-related protein	-3	down	down	down	down	down	down
GRMZM2G170307	Chaperone protein dnaJ 20 chloroplastic	-3	down	down	down			down	down
GRMZM2G170812	NAD(P)-binding Rossmann-fold superfamily protein	-3	down	down	down			down		down
GRMZM2G300862	Aspartokinase 1 chloroplastic	-3	down	down		down	down	down
GRMZM2G347956	Plastid-specific 30S ribosomal protein 1	-3			down	down	down	down
GRMZM2G373859	GDU1	-3	down			down	down	down
GRMZM2G467338	Aconitate hydratase 3 mitochondrial	-3		down				down	down
GRMZM5G867185	SCL25B arginine/serine-rich splicing factor SCL25B transcript III	-3	down	down	down			down		down
GRMZM5G899349	Sterol 14-demethylase	-3		down	down	down	down	down
GRMZM2G007914		-3		down		down	down	down
GRMZM2G027495	E3 ubiquitin-protein ligase RHF2A	-3	down			down	down	down
GRMZM2G031138	UDP-glycosyltransferase 83A1	-3		down		down	down	down
GRMZM2G034410	small G protein family protein / RhoGAP family protein	-3	down	down	down	down	down	down
GRMZM2G050693	Electron transporter	-3	down	down		down	down	down
GRMZM2G054715	Katanin p60 ATPase-containing subunit A1	-3	down		down	down	down	down
GRMZM2G089106	Protein LOL4 Protein LOL4 Protein LOL4	-3		down	down	down	down	down
GRMZM2G090061		-3		down	down	down	down	down
GRMZM2G093270	platz13 - PLATZ-transcription factor 13	-3	down	down		down	down	down
GRMZM2G098346	alcohol dehydrogenase2	-3	down	down		down	down	down
GRMZM2G103873		-3		down		down	down	down
GRMZM2G138349	ADP-ribosylation factor GTPase-activating protein AGD12	-3	down	down	down	down	down	down
GRMZM2G148281	12-oxo-phytodienoic acid reductase7	-3	down	down		down	down	down
GRMZM2G161641	Probable amino acid permease 7	-3		down	down	down	down	down
GRMZM2G306741		-3	down	down	down	down	down	down
GRMZM2G445616	DNA topoisomerase 2	-3	down	down	down	down	down	down
GRMZM2G468439	NAD(P)-binding Rossmann-fold superfamily protein	-3	down	down	down	down	down	down
GRMZM2G025531	Metallopeptidase M24 family protein	-3	up		down			up		up
AC217975.3_FG001	pyruvate orthophosphate dikinase4	-2	down	down	down			down
GRMZM2G002959	Acyl-coenzyme A oxidase 4 peroxisomal	-2	down					down
GRMZM2G007801	Probable receptor-like protein kinase	-2	down	down	down			down
GRMZM2G011078	Secretory carrier-associated membrane protein 3	-2	down					down
GRMZM2G020091	Tetraspanin-3	-2	down	down	down			down
GRMZM2G027750	Cullin-3B	-2	down		down			down
GRMZM2G030523	Proliferating cell nuclear antigen	-2	down					down
GRMZM2G031846	Serine/arginine-rich splicing factor SR45a	-2	down	down	down			down
GRMZM2G035809	Serine/threonine-protein kinase SRK2C	-2	down	down	up			down
GRMZM2G038284		-2	down	down				down
GRMZM2G051103	CBL-interacting serine/threonine-protein kinase 9	-2	down		down			down
GRMZM2G059102	mads68 - MADS-transcription factor 68	-2	down	down	down			down
GRMZM2G063473	APO protein 2 chloroplastic	-2	down	down				down
GRMZM2G068943	trehalose-6-phosphate synthase1	-2			down			down
GRMZM2G070041		-2	down	down				down
GRMZM2G085467	bhlh146 - bHLH-transcription factor 146	-2	down	down	down			down
GRMZM2G086789		-2	down					down
GRMZM2G087192	12-oxo-phytodienoic acid reductase5	-2	down	down	down			down
GRMZM2G092182	KH domain-containing protein	-2		down				down
GRMZM2G098643	Putative auxin efflux carrier	-2	down					down
GRMZM2G104608	DNA photolyases;DNA photolyases	-2	down	down	down			down
GRMZM2G107571	Exportin-4	-2		down				down
GRMZM2G109140	F-box protein FBW2	-2	down	down	down			down
GRMZM2G111017	Probable ADPATP carrier protein	-2	down	down				down
GRMZM2G130746	Histone H2A	-2	down	down				down
GRMZM2G131853	shaggy-related protein kinase alpha-like	-2	down	down	down			down
GRMZM2G136344	zeaxanthin epoxidase2	-2	down	down	down			down
GRMZM2G140998		-2	down	down				down
GRMZM2G144021	alpha/beta-Hydrolases superfamily protein	-2	down		down			down
GRMZM2G149132	Probable protein phosphatase 2C 22	-2		down				down
GRMZM2G152477	Purple acid phosphatase 1	-2	down			up	up	down
GRMZM2G173700	kinesin-related protein3	-2	down					down
GRMZM2G174048	Copper ion binding protein	-2	down	down				down
GRMZM2G177229	Splicing factor U2af small subunit A	-2	down	down	down			down
GRMZM2G181018		-2	down	down	down			down
GRMZM2G322917	Expressed protein; protein	-2			down			down
GRMZM2G355610	Putative CRAL/TRIO domain containing%2C Sec14p-like phosphatidylinositol transfer family protein	-2	down	down	down			down
GRMZM2G366150	Leucine-rich repeat family protein	-2	down	down	down			down
GRMZM2G377131		-2	down	down	down			down
GRMZM2G416069	Structural maintenance of chromosomes (SMC) family protein	-2	down	down				down
GRMZM2G438895	auxin-like 1 protein	-2	down	down	down			down
GRMZM2G480516	Fatty acyl-CoA reductase 1	-2	down	down	down			down
GRMZM5G875564	Oxysterol-binding protein 1%3B Putative oxysterol binding domain family protein	-2	down					down
GRMZM5G886785	SPla/RYanodine receptor (SPRY) domain-containing protein	-2		down				down
GRMZM5G894233	Proline transporter 2	-2	down	down	down			down
GRMZM2G029543	Malonyl CoA-acyl carrier protein transacylase	-2	up		down			up
GRMZM2G127230	Signal recognition particle 54 kDa protein chloroplastic	-2	up	down				up
GRMZM2G179133	Nudix hydrolase 16 mitochondrial	-2		down				down
GRMZM2G059799	F-box protein	0	down			up	up	down
GRMZM2G070659	hypersensitive induced reaction3	0	down	down		up	up	down		down
GRMZM2G088436		0	down	down	down	up	up	down
GRMZM2G091964	Nuclear transcription factor Y subunit A-9	0		down	down	up	up	down
GRMZM2G101000	Type IV inositol polyphosphate 5-phosphatase 9	0	down		down	up	up	down
GRMZM2G479703	Oligopeptide transporter 7	0	down			up	up	down
GRMZM2G002220	Heat shock protein 90-5 chloroplastic	0	up	up		down	down	up
GRMZM2G009530	GATA zinc finger family protein	0		up		down	down	down
GRMZM2G014826		0	down	down	down	up	up	up
GRMZM2G018586	ER6 protein	0	up	up		down	down	down
GRMZM2G022054	Neuropilin-2	0			down	up	up	down
GRMZM2G024303	GroES-like zinc-binding alcohol dehydrogenase family protein	0	up	up				down
GRMZM2G033649	Putative patellin family protein	0		down				up
GRMZM2G036905		0		down	down	up	up	down
GRMZM2G038152	Galactose oxidase/kelch repeat superfamily protein	0		up				down
GRMZM2G059502	Chaperone DnaJ-domain superfamily protein	0	down	down	down	up	up	down
GRMZM2G061096	Transmembrane 9 superfamily protein member 1	0	up	up	up			down
GRMZM2G071959	Histone H2B.1	0	up	up	up			down
GRMZM2G074599	Pentatricopeptide repeat-containing protein	0	up	up	up			down
GRMZM2G081188	Protein root UVB sensitive 6	0	up	up	up	up	up	down
GRMZM2G081626	senescence enhanced2a	0	down			up	up	down
GRMZM2G084149	myosin heavy chain-related	0	up	up	up			down
GRMZM2G084406		0	up			up	up	down
GRMZM2G109674	Protein SMAX1-LIKE 7	0	up			down	down	down
GRMZM2G127591	GDP-mannose transporter GONST5	0	down			up	up	up
GRMZM2G132519	Ribosome biogenesis regulatory protein homolog	0		up				down
GRMZM2G137108	NOD26-like membrane intrinsic protein2	0			up	up	up	down
GRMZM2G139462	Amino acid kinase family protein	0	up	up	up			down
GRMZM2G149979	Plant UBX domain-containing protein 7	0	up					down
GRMZM2G151807		0		up		up	up	down
GRMZM2G152470	Homocysteine S-methyltransferase 3	0	down	down	down			up
GRMZM2G152485	CAAX amino terminal protease family protein	0	down	down				up
GRMZM2G155849	Protein AUXIN SIGNALING F-BOX 3	0	down	down		up	up	down
GRMZM2G167957	Inositol-tetrakisphosphate 1-kinase 3	0	down	down	down	up	up	down
GRMZM2G169160	seryl-tRNA synthetase	0	down					up		up
GRMZM2G171387	Histone H3	0	up	up	up			down
GRMZM2G181081	CBL-interacting kinase	0			up	down	down	down
GRMZM2G304575	Histone H2B	0	up					down
GRMZM2G318635	Protein TSS	0	down	down				up		up
GRMZM2G347836	Lipid phosphate phosphatase epsilon 2 chloroplastic	0		up		down	down	down
GRMZM2G349996	Nucleic acid-binding OB-fold-like protein	0	down		down	up	up	down
GRMZM2G359038	ADPATP carrier protein 1 chloroplastic	0		up	up	down	down	down
GRMZM2G418258	Histone H3.2	0	up	up		down	down	down
GRMZM2G449496	Protein plastid transcriptionally active 16 chloroplastic	0	down	down				up
GRMZM2G465169	65-kDa microtubule-associated protein 1	0	up	up		down	down	down		down
GRMZM2G475899	Histone H3.2	0	up	up	up	down	down	down	up
GRMZM2G477741	Metal tolerance protein A2	0		up				down
GRMZM2G524711	inter-alpha-trypsin inhibitor heavy chain-related	0			up			down
GRMZM2G700683	Carbamoyl-phosphate synthase large chain chloroplastic	0		down	down	up	up	down
GRMZM5G801436	UMP-CMP kinase 3	0	up			up	down	down
GRMZM5G802801	Probable mediator of RNA polymerase II transcription subunit 37c	0	down	down	down	up	up	down
GRMZM5G817551	Ubiquinone biosynthesis protein ubiB	0			up	up	up	down
GRMZM5G883741	Tripeptidyl-peptidase 2	0	up	up	up			down
GRMZM2G056038	multiple ankyrin repeat domains protein 2	0	up	up	up	up	up	down	up
GRMZM2G073275	Histone H4	0	up	up		up	down	down	up
GRMZM2G417107		0		up		down	down	up
GRMZM5G863385		0	up	up	up	down	up	down
GRMZM2G064679		0	up			up	up	down
GRMZM2G041223	Putative growth-regulating factor 6	2		up	up			up
GRMZM2G059308	kaurene oxidase1	2	up		down			up
GRMZM2G065908		2	up					up
GRMZM2G072264	RNA-binding (RRM/RBD/RNP motifs) family protein	2		up				up
GRMZM2G075153	Cystathionine gamma-synthase 1 chloroplastic	2	up	up				up
GRMZM2G076544	Photosynthetic NDH subunit of lumenal location 5 chloroplastic	2	up	up				up
GRMZM2G095039	Protein RALF-like 33	2	up	up				up
GRMZM2G122853	Peroxidase 2	2	up					up
GRMZM2G127687	Putative inactive receptor-like protein kinase	2		up		up	down	up
GRMZM2G131708	S-adenosyl-L-methionine-dependent methyltransferases superfamily protein	2		up	up			up
GRMZM2G132704	Mediator of RNA polymerase II transcription subunit 31	2	up	up	up			up
GRMZM2G143235	3-epi-6-deoxocathasterone 23-monooxygenase	2		down		up	up	up
GRMZM2G152801	fls1 - flavonol synthase1	2	up	up	up			up
GRMZM2G153476	30S ribosomal protein S13 chloroplastic	2	up					up
GRMZM2G154648	thiamine monophosphate synthase	2	up	up	up			up
GRMZM2G171604	proteasome component4	2	up	up	up			up
GRMZM2G176820	50S ribosomal protein L11 chloroplastic	2	up					up
GRMZM2G305582	Zinc finger CCCH domain-containing protein 12	2	up					up
GRMZM2G389233	Peptidase M1 family protein	2	up					up
GRMZM2G424053	Thioredoxin H4	2	up	up				up
GRMZM5G801875	Putative MATE efflux family protein%3B Transparent testa 12 protein	2	up	up	up			up
GRMZM6G314950		2			up			up
GRMZM2G080816	Rhodanese-like domain-containing protein 4A chloroplastic	3	up					up		up
GRMZM2G136486	Elicitor-responsive protein 3	3		up		down	up	up
GRMZM2G140694	Dof zinc finger protein DOF2.1	3	up			up	up	up
GRMZM2G159250	Ribosome-recycling factor chloroplastic	3	up					up		up
AC231745.1_FG004	Protein-tyrosine sulfotransferase	3			up	up	up	up
GRMZM2G028556	glutathione transferase7	3	up	up	up	up	up	up
GRMZM2G031311	salmon silks1	3	up	up	up			up	up
GRMZM2G033626	26S proteasome non-ATPase regulatory subunit 14 homolog	3			up	up	up	up
GRMZM2G051619	Gibberellin 2-beta-dioxygenase	3	up	up	up	up	up	up
GRMZM2G052266	Probable sarcosine oxidase	3	up	up	up	up	up	up
GRMZM2G064541	NAC domain-containing protein 89	3		up		up	up	up
GRMZM2G091189	chaperonin10	3	up	up				up		up
GRMZM2G123667	NAC domain-containing protein 2	3	up			up	up	up
GRMZM2G129804	Elongation factor P	3	up	up	up			up		up
GRMZM2G130586		3		up	up	up	up	up
GRMZM2G155242	low phytic acid1	3	up			up	up	up
GRMZM2G180283	salmon silk2	3	up		up			up		up
GRMZM2G467147	F-box/LRR-repeat protein 3	3			up	up	up	up
GRMZM2G469523	UDP-glucose 4-epimerase 4	3	up		up	up	up	up
GRMZM5G827496	Protein NRT1/ PTR FAMILY 3.1	3	up	up	up	up	up	up
GRMZM5G863596	Alpha-amylase 3 chloroplastic	3	up	up	up			up		up
GRMZM2G100058	Pentatricopeptide repeat-containing protein mitochondrial	4	up					up	up	up
GRMZM2G036217	male sterile protein homolog1	4	up	up	up	up	up	up	up
GRMZM2G118047	HSF28 HSF type transcription factor	4	up	up		up	up	up	up
GRMZM2G139689	L-aspartate oxidase chloroplastic	4	up	up	up	up	up	up	up
GRMZM2G149317	phytoene synthase2	4	up			up	up	up		up
GRMZM2G175642		4	up	up	up	up	up	up	up
GRMZM2G302245	regulator of chromosome condensation1	4	up	up	up	up	up	up		up
GRMZM5G898867		4	up	up	up	up	up	up	up
